# Supplementary material for: The Crucial Role of SlGSNOR in Regulating Postharvest Tomato Fruit Ripening
Source: MDPI journal article supplement (doi:10.3390/ijms25052729), 2024-02-27
Supplement: s1 [file s1]

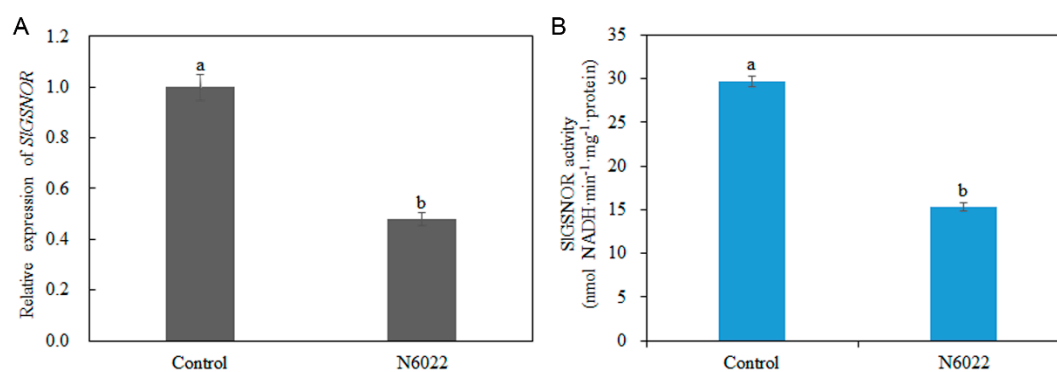

**Figure S1. Effects of N6022 on *SIGSNOR* gene expression and *SIGSNOR* enzyme activity.** (A) Expression of *SIGSNOR*; (B) *SIGSNOR* activity. Error bars represent standard deviations (n=3). Different lowercase letters denote statistically significant distinctions within different treatments according to Duncan's test ( $p < 0.05$ ).

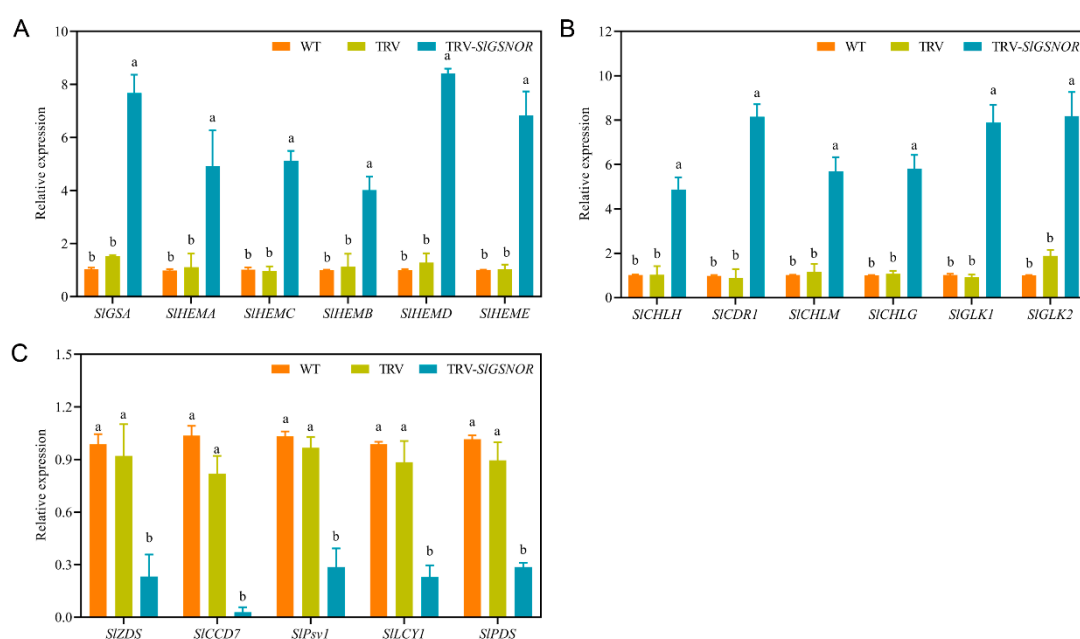

**Figure S2. Effect of *SIGSNOR* silencing on pigment metabolism-related gene expressions.** (A) Expressions of *SIGSA*, *SIHEMA*, *SIHEMC*, *SIHEMB*, *SIHEMD*, and *SIHEME*; (B) Expressions of *SICHLH*, *SICDR1*, *SICHLM*, *SICHLG*, *SIGLK1*, and *SIGLK2*; (C) Expressions of *SIZDS*, *SICCD7*, *SIPsy1*, *SILCY1*, and *SIPDS*. Error bars represent standard deviations (n=3). Different lowercase letters denote statistically significant distinctions within different treatments according to Duncan's test ( $p < 0.05$ ).

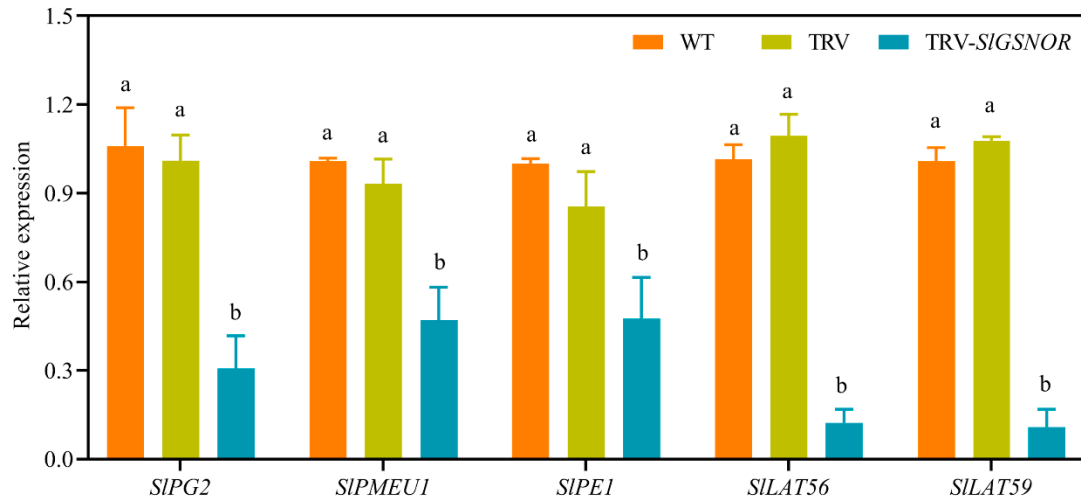

**Figure S3. Effect of *SIGSNOR* silencing on hardness and texture related gene expressions.** Expressions of *SIPG2*, *SIPMEU1*, *SIPE1*, *SILAT56*, and *SILAT59*. Error bars represent standard deviations (n=3). Different lowercase letters denote statistically significant distinctions within different treatments according to Duncan's test ( $p < 0.05$ ).

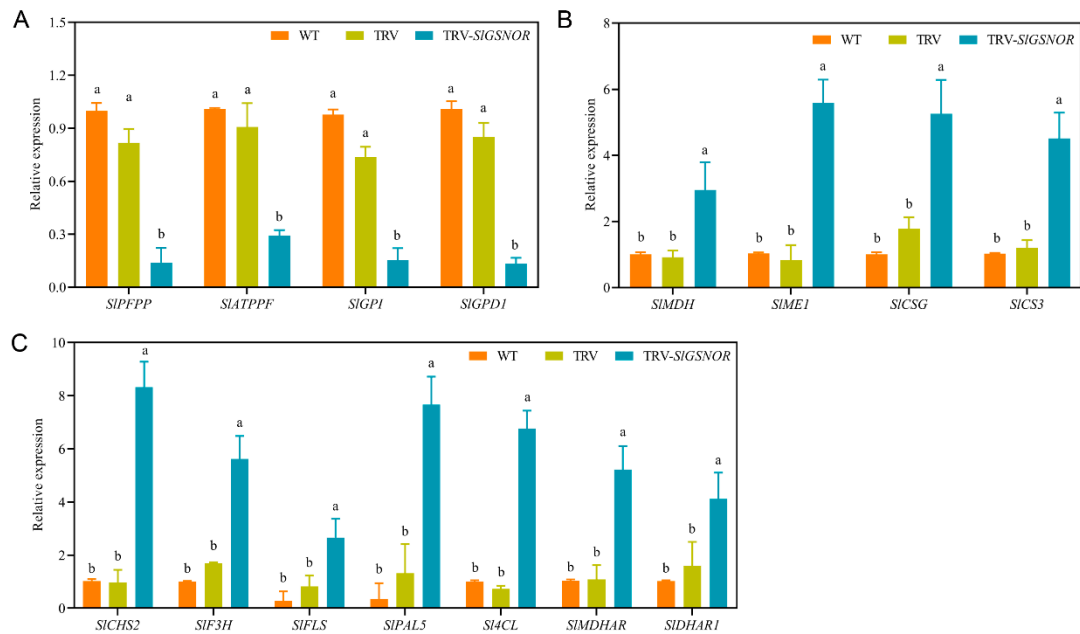

**Figure S4. Effect of *SIGSNOR* silencing on nutrient related gene expressions.** (A) Expressions of *SIPFPP*, *SIATPPF*, *SIGPI*, and *SIGPD1*; (B) Expressions of *SIMDH*, *SIME1*, *SICSG*, and *SICS3*; (C) Expressions of *SICH2*, *SIF3H*, *SIFLS*, *SIPAL5*, *SI4CL*, *SIMDHAR*, and *SIDHAR1*. Error bars represent standard deviations (n=3). Different lowercase letters denote statistically significant distinctions within different treatments according to Duncan's test ( $p < 0.05$ ).

**Table S1. Primers used for qRT-PCR analysis.**

| Gene name      | Gene ID                   | Primer sequence (5' to 3' )  |                                 |
|----------------|---------------------------|------------------------------|---------------------------------|
| <i>SIACTIN</i> | Solyc10g080500.2.1        | F: AATGAACTTCGTGTGGCTCCAGAG  | R: ATGGCAGGGGTGTTGAAGGTTTC      |
| <i>SIGSA</i>   | Solyc04g009200.3.1        | F: CCATCTCACCGTCGATGCAA      | R: TGGCATCAACTCCTTGGCTT         |
| <i>SIHEMA</i>  | Solyc04g076870.4.1        | F: AACTTCTGCTGCTGATCGATATAC  | R: CGACTGGTGCTGTGTGAATG         |
| <i>SIHEMC</i>  | Solyc03g098795.1.1        | F: ACCTGCAGATCCGTTTCCTG      | R: GGCAGCGGCAAGAATAATGG         |
| <i>SIHEMB</i>  | Solyc08g069030.4.1        | F: ATGGTCTTGTGAAGAGGTC       | R: TATCAGTCCTTCAGACTCA          |
| <i>SIHEMD</i>  | Solyc04g079320.4.1        | F: TACTCGGCTGAACACTTACACAACG | R: TGCTACAGTAACAACGGGAACAGAG    |
| <i>SIHEME</i>  | Solyc10g007320.3.1        | F: GCTTGTGTTGTGGAATTAGGG     | R: AAAATTGCAGCTTGTCTCC          |
| <i>SICHLH</i>  | Solyc04g015750.3.1        | F: GCTTTGGACCCACAGGCTAT      | R: CTGTGCCAACGACTCTCCAT         |
| <i>SICDR1</i>  | Solyc08g005830.1.1        | F: CCATCGTGATTCTCCTCTTT      | R: ACATTACCACCACCTAAACC         |
| <i>SICHLM</i>  | Solyc03g118240.4.1        | F: ACCTTAAACCCTAATCCCCAAC    | R: TGCCGCCACTGAACTACCT          |
| <i>SICHLG</i>  | Solyc09g014760.4.1        | F: TTCAACTACAACAACCCACTTCG   | R: CGTTTCTTGCTTGGCTCCTTT        |
| <i>SIGLK1</i>  | Solyc07g053630.4.1        | F: GAGAAGTGGAGGCAGCGAGTTG    | R: GAGAAGTGGAGGCAGCGAGTTG       |
| <i>SIGLK2</i>  | Solyc10g008160.3.1        | F: AGCTTATGGCAACTCATGGTCTCAC | R: CGATTGTGGTGGCTCCGCTATAC      |
| <i>SIZDS</i>   | Solyc01g097810.3.1        | F: CGGTTATTCGGGCTGATTG       | R: CCAAATCAGCCCCGAATAACC        |
| <i>SICCD7</i>  | Solyc01g090660.3.1        | F: CCACGTCCCCAACTCATGAA      | R: CTTCCACGACCCGAAGTGAA         |
| <i>SIPsy1</i>  | Solyc03g031860.3.1        | F: TTATGTTGCTGGTACGGTTGGGTTG | R: CGCTCTCTGTTGTTGCCTTTGATTC    |
| <i>SILCY1</i>  | Solyc04g040190.1.1        | F: GTTGTGTGGATCTTGCTGTGGTTG  | R: AGAGAGTCCTGCTTCAGAACTTGC     |
| <i>SIPDS</i>   | Solyc03g123760.3.1        | F: TTATCTCGCAAGTGTGGCTATGGTG | R: GAAGATGCCTGCTTTCGGTGATTG     |
| <i>SIPG2</i>   | Solyc10g080210.2.1        | F: TGGAGGAGGAGGAACATCAATGGC  | R: GTTAAGGCCGTTGGTGCATCCC       |
| <i>SIPMEU1</i> | Solyc03g123620.4.1        | F: AAGCCGTTTCGACGCAACTACTATG | R: AGTGTCTCGTCCATCGTCTCCAG      |
| <i>SIPe1</i>   | Solyc07g064190.2.1        | F: CCCGCTAAAGCTATGCCGTTTAC   | R: CACATACGCCACGCCAGTAGAC       |
| <i>SILAT56</i> | Solyc03g058910.3.1        | F: GCACTCGGGACAGCAATAAA      | R: GTCACATCTCCAGCACTTGTC        |
| <i>SILAT59</i> | Solyc03g058890.4.1        | F: ATTAGGTTGCACCAGGAGATG     | R: GAGGGTTATACCAGCACCTTTAG      |
| <i>SIPFPP</i>  | Solyc02g081160.3.1        | F: GAGATCCACACGGCAATGTCCAG   | R: CCTTCTGCTTCCTCTGATCCAATC     |
| <i>SIATPPF</i> | Solyc08g066100.3.1        | F: CACGGCTTCTTGCTTCAACCAATC  | R: CTTTGTGAGTGCTGTGCTTATGC      |
| <i>SIGPI</i>   | Solyc12g014380.3.1        | F: CATTCGCTTCTTGGACTGGGTAG   | R: ATGGTGCTGAGAGGAAATGCTGATC    |
| <i>SIGPD1</i>  | Solyc02g093830.4.1        | F: GCCGTATTCGTGGGTATCTTTCTCG | R: TTCGTGCTCAGATATTGCCTTGTC     |
| <i>SIMDH</i>   | Solyc11g007990.2.1        | F: ATGAGGTGTTCCAGGATGCAGAATG | R: TCCAATAAGCCAGCTCGTTCCATAC    |
| <i>SIME1</i>   | Solyc12g044600.3.1        | F: TCCCTCCTCTCATCCTCCCTCTC   | R: CCCAGCTCCAGAAGATCCAATCAAG    |
| <i>SICSG</i>   | Solyc12g011000.2.1        | F: ACAGCATTACAGCAGTTCCACAAGG | R: AAGCATTAGCGGGTGACGAATCTG     |
| <i>SICS3</i>   | Solyc01g073740.4.1        | F: GTCTTTCTCCGCCTCTGTCTGTTTG | R: GCTCGGCAATATGGGATCGTGAC      |
| <i>SICH52</i>  | Solyc05g053550.3.1        | F: GCCGACTACCAACTACCAAGC     | R: TCCCACCAGCAAAGCAACCTTG       |
| <i>SIF3H</i>   | Solyc02g083860.3.1        | F: GAGGCAATGGGCTTAGAGAAAGAGG | R: GGTAATGGTTCCTGGATCGGTGTG     |
| <i>SIFLS</i>   | Solyc11g013110.2.1        | F: ACCTTGAATGAGTCGGTGCTTGTTG | R: GAGCCAGATTGTGGTCAGGTGTTT     |
| <i>SIPAL5</i>  | Solyc09g007910.2.1        | F: GCCATCTAATCTCACAGCAGGAAGG | R: AAGTTCCGAGCAGTAAGAAGCCATC    |
| <i>SI4CL</i>   | Solyc03g117870.3.1        | F: ACCGCCTATTGTTCTCGCCATTG   | R: GCTCGGACGGCATCTTCAAGTTC      |
| <i>SIMDHAR</i> | Solyc08g081530.3.1        | F: TGCTTCTCCACCATAACCCATTGC  | R: GCGCGAAAGTTCAACAAGATCAGTG    |
| <i>SIDHAR1</i> | Solyc05g054760.4.1        | F: AAGAAGTGGAGTGTGCCTGAAAGC  | R: CACGCATACAAGGACACGGTGAG      |
| <i>SIGSNOR</i> | <b>Solyc09g064370.4.1</b> | <b>F: ATGGCTACACAAGGTCAA</b> | <b>R: GTCCTGGATATGTTTGTATGA</b> |

**Table S2. The complete name, function, pathway, and classification of the detected genes.**

| Gene name     | Complete name                                 | Function                                                                                                      | Pathway                                                                                                 | Gene classification                    |
|---------------|-----------------------------------------------|---------------------------------------------------------------------------------------------------------------|---------------------------------------------------------------------------------------------------------|----------------------------------------|
| <i>SIGSA</i>  | glutamate 1-semialdehyde 2,1-aminomutase      | enables glutamate-1-semialdehyde 2,1-aminomutase activity                                                     | involved_in tetrapyrrole biosynthetic process that related to chlorophyll biosynthesis                  | chlorophyll biosynthesis-related genes |
| <i>SIHEMA</i> | glutamyl-tRNA reductase                       | enables glutamyl-tRNA reductase activity                                                                      | involved_in tetrapyrrole biosynthetic process that related to chlorophyll biosynthesis                  |                                        |
| <i>SIHEMC</i> | hydroxymethylbilane synthase                  | enables hydroxymethylbilane synthase activity                                                                 | involved_in chlorophyll biosynthetic process                                                            |                                        |
| <i>SIHEMB</i> | $\delta$ -aminolevulinic acid dehydratase     | enables porphobilinogen synthase activity                                                                     | involved_in heme biosynthetic process that related to chlorophyll biosynthesis                          |                                        |
| <i>SIHEMD</i> | uroporphyrinogen-III synthase                 | enables uroporphyrinogen-III synthase activity                                                                | involved_in uroporphyrinogen III biosynthetic process that related to chlorophyll biosynthesis          |                                        |
| <i>SIHEME</i> | uroporphyrinogen decarboxylase                | enables uroporphyrinogen decarboxylase activity                                                               | involved_in porphyrin-containing compound biosynthetic process that related to chlorophyll biosynthesis |                                        |
| <i>SICHLH</i> | magnesium-chelatase H subunit                 | enables magnesium chelatase activity                                                                          | involved_in chlorophyll biosynthetic process                                                            |                                        |
| <i>SICDR1</i> | aspartic proteinase                           | enables aspartic-type endopeptidase activity                                                                  | involved_in proteolysis process that related chlorophyll biosynthetic process                           |                                        |
| <i>SICHLM</i> | magnesium protoporphyrin IX methyltransferase | enables magnesium protoporphyrin IX methyltransferase activity                                                | involved_in chlorophyll biosynthetic process                                                            |                                        |
| <i>SICHLG</i> | chlorophyll synthase                          | enables chlorophyll synthetase activity                                                                       | involved_in chlorophyll biosynthetic process                                                            |                                        |
| <i>SIGLK1</i> | golden1-like protein 1                        | enables DNA-binding transcription factor activity                                                             | involved_in positive regulation of DNA-templated transcription that related to chlorophyll biosynthesis |                                        |
| <i>SIGLK2</i> | golden1-like protein 2                        | enables DNA-binding transcription factor activity                                                             | involved_in positive regulation of DNA-templated transcription that related to chlorophyll biosynthesis |                                        |
| <i>SIZDS</i>  | $\zeta$ -carotene desaturase                  | enables 9,9'-di-cis- $\zeta$ -carotene desaturase activity                                                    | involved_in carotenoid biosynthetic process                                                             |                                        |
| <i>SICCD7</i> | carotenoid cleavage dioxygenase 7             | enables 9-cis-epoxycarotenoid dioxygenase activity                                                            | involved_in carotene catabolic process                                                                  |                                        |
| <i>SIPsy1</i> | phytoene synthase 1                           | enables phytoene synthase activity                                                                            | involved_in carotenoid biosynthetic process                                                             |                                        |
| <i>SILCY1</i> | lycopene $\beta$ -cyclase 1                   | enables oxidoreductase activity, acting on paired donors, with incorporation or reduction of molecular oxygen | involved_in carotenoid biosynthetic process                                                             |                                        |
| <i>SIPDS</i>  | phytoene dehydrogenase                        | enables phytoene dehydrogenase activity                                                                       | involved_in carotenoid biosynthetic process                                                             |                                        |

|                |                                                                               |                                                                             |                                                       |                                                |
|----------------|-------------------------------------------------------------------------------|-----------------------------------------------------------------------------|-------------------------------------------------------|------------------------------------------------|
| <i>SIPG2</i>   | polygalacturonase-2a                                                          | enables polygalacturonase activity                                          | involved_in pectin catabolic process                  | fruit softening-related genes                  |
| <i>SIPMEU1</i> | pectin methylesterase                                                         | enables pectinesterase activity                                             | involved_in cell wall modification                    |                                                |
| <i>SIPE1</i>   | pectinesterase 1                                                              | enables pectinesterase activity                                             | involved_in cell wall modification                    |                                                |
| <i>SILAT56</i> | pectate lyase P56                                                             | enables pectate lyase activity                                              | involved_in cell wall degradation and fruit softening |                                                |
| <i>SILAT59</i> | pectate lyase P59                                                             | enables pectate lyase activity                                              | involved_in cell wall degradation and fruit softening |                                                |
| <i>SIPFPP</i>  | pyrophosphate-fructose 6-phosphate 1-phosphotransferase subunit $\beta$ -like | enables diphosphate-fructose-6-phosphate 1-phosphotransferase activity      | involved_in fructose 6-phosphate metabolic process    | glucose and fructose metabolism-related genes  |
| <i>SIATPPF</i> | ATP-dependent 6-phosphofructokinase 6                                         | enables 6-phosphofructokinase activity                                      | involved_in fructose 6-phosphate metabolic process    |                                                |
| <i>SIGPI</i>   | glucose-6-phosphate isomerase                                                 | enables glucose-6-phosphate isomerase activity                              | involved_in glucose 6-phosphate metabolic process     |                                                |
| <i>SIGPD1</i>  | glucose-6-phosphate 1-dehydrogenase 1                                         | enables glucose-6-phosphate dehydrogenase activity                          | involved_in glucose metabolic process                 |                                                |
| <i>SIMDH</i>   | malate dehydrogenase                                                          | enables L-malate dehydrogenase activity                                     | involved_in malate metabolic process                  |                                                |
| <i>SIME1</i>   | NADP-malic enzyme                                                             | enables malate dehydrogenase (decarboxylating) (NAD <sup>+</sup> ) activity | involved_in malate metabolic process                  |                                                |
| <i>SICSG</i>   | citrate synthase, glyoxysomal                                                 | enables citrate (Si)-synthase activity                                      | involved_in carbohydrate metabolic process            |                                                |
| <i>SICS3</i>   | citrate synthase 3                                                            | enables citrate (Si)-synthase activity                                      | involved_in carbohydrate metabolic process            |                                                |
| <i>SICHS2</i>  | chalcone synthase                                                             | enables chalcone synthase activity                                          | involved_in flavonoid metabolism process              | flavonoid metabolism-related genes             |
| <i>SIF3H</i>   | flavanone 3-hydroxylase                                                       | enables flavanone 3-hydroxylase activity                                    | involved_in flavonoid metabolism process              |                                                |
| <i>SIFLS</i>   | flavonol synthase                                                             | enables flavonol synthase activity                                          | involved_in flavonoid metabolism process              |                                                |
| <i>SIPAL5</i>  | phenylalanine ammonia-lyase 5                                                 | enables ammonia-lyase activity                                              | involved_in phenol metabolism process                 | phenol metabolism-related genes                |
| <i>SI4CL</i>   | 4-coumarate-CoA ligase                                                        | enables CoA-ligase activity                                                 | involved_in phenol metabolism process                 |                                                |
| <i>SIMDHAR</i> | monodehydroascorbate reductase                                                | enables oxidoreductase activity, acting on NAD(P)H                          | involved_in ascorbic acid metabolism process          | ascorbic acid metabolism-related genes         |
| <i>SIDHAR1</i> | dehydroascorbate reductase 1                                                  | enables glutathione dehydrogenase (ascorbate) activity                      | involved_in ascorbate glutathione cycle               |                                                |
| <i>SIGSNOR</i> | S-nitrosoglutathione reductase                                                | enables S-nitrosoglutathione reductase activity                             | involved_in reduction of protein S-nitrosylation      | protein S-nitrosylation reduction-related gene |
